# Supplementary material for: Self-Standing Pd-Based Nanostructures for Electrocatalytic CO Oxidation: Do Nanocatalyst Shape and Electrolyte pH Matter?
Source: MDPI journal article supplement (doi:10.3390/ijms241411832), 2023-07-23
Supplement: s1 [file s1]

## Supporting Information

# Self-Standing Pd-Based Nanostructures for Electrocatalytic CO Oxidation: Do Nanocatalyst Shape and Electrolyte pH Matter?

Belal Salah <sup>1,2,†</sup>, Adewale K. Ipadeola <sup>1,2,†</sup>, Aboubakr M. Abdullah <sup>1,\*</sup>, Alaa Ghanem <sup>3</sup> and Kamel Eid <sup>2,\*</sup>

<sup>1</sup> Center for Advanced Materials, Qatar University, Doha 2713, Qatar

<sup>2</sup> Gas Processing Center (GPC), College of Engineering, Qatar University, Doha 2713, Qatar

<sup>3</sup> PVT-Lab, Production Department, Egyptian Petroleum Research Institute, Cairo 11727, Egypt

\* Correspondence: bakr@qu.edu.qa (A.M.A.); kamel.eid@qu.edu.qa (K.E.)

† These authors contributed equally to this work.

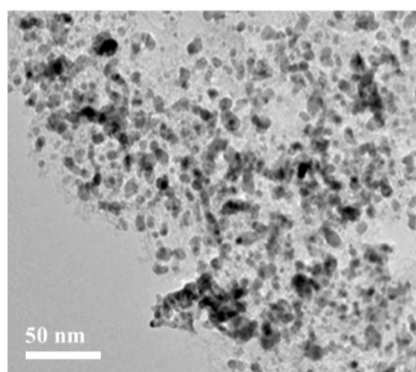

Figure S1. TEM of the Pd/C.

Table S1. Binding energies of Pd 3d in Pd nanocube, Pd nanosponge, and Pd/C catalysts.

| Catalyst      | Pd 3d <sub>5/2</sub> |                  | Pd 3d <sub>3/2</sub> |                  |
|---------------|----------------------|------------------|----------------------|------------------|
|               | Pd <sup>0</sup>      | Pd <sup>2+</sup> | Pd <sup>0</sup>      | Pd <sup>2+</sup> |
| Pd nanocube   | 333.52               | 335.43           | 338.93               | 342.49           |
| Pd nanosponge | 333.73               | 335.62           | 338.94               | 341.34           |

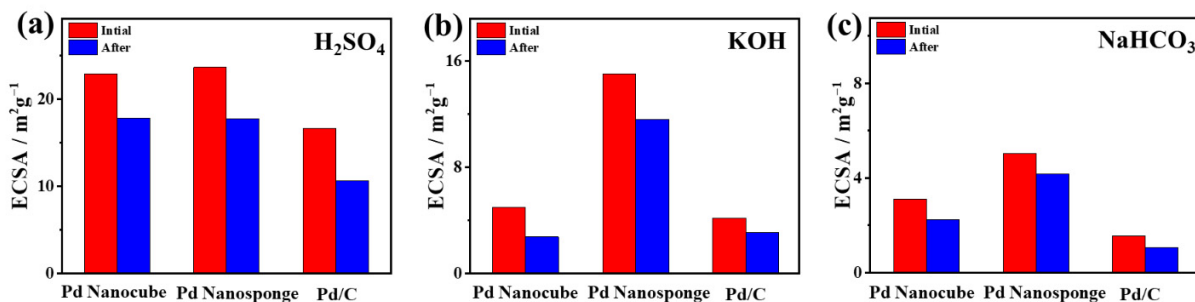

Figure S2. The ECSA before and after electrochemical CO oxidation stability (a) 0.1 M H<sub>2</sub>SO<sub>4</sub>, (b) 0.1 M KOH and (c) 0.5 M NaHCO<sub>3</sub>.

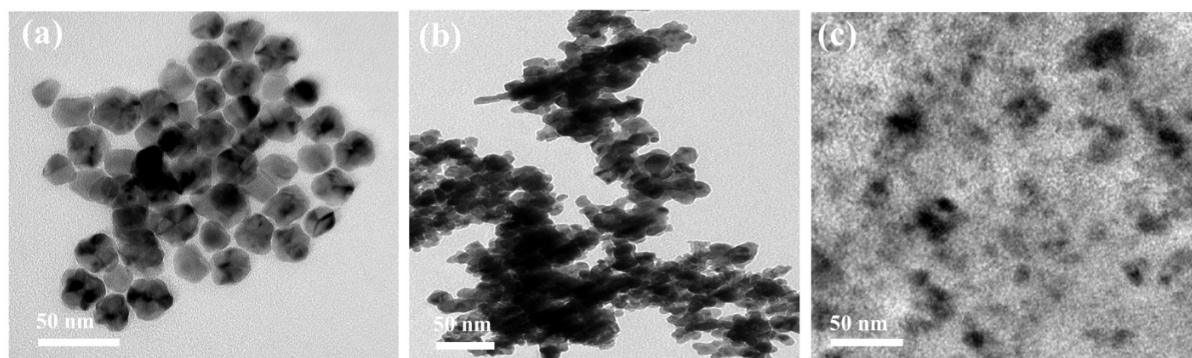

Figure S3. TEM of the catalyst after the stability test in 0.1 M H<sub>2</sub>SO<sub>4</sub> (a) Pd nanocube, (b) Pd nanosponge, and (c) Pd/C.

Table S2. Electrochemical activity comparison of our prepared catalysts related to the previously reported works.

| Catalyst                                         | Medium/ scan rate/<br>Reference electrode                               | Maximum current (mA cm <sup>-2</sup> ) density/voltage (V) | Ref.     |
|--------------------------------------------------|-------------------------------------------------------------------------|------------------------------------------------------------|----------|
| Pd nanocube<br>Pd nanosponge                     | 0.1M H <sub>2</sub> SO <sub>4</sub><br>50mV/s<br>Ag/AgCl                | 5.92 / 0.755<br>4.0 / 0.715                                | Our work |
| PtPd Nanodendrites                               | 1 M KOH<br>50 mV/s<br>Ag/AgCl                                           | 5.1 / -0.15                                                | [1]      |
| Pd/Ti <sub>3</sub> C <sub>2</sub> T <sub>x</sub> | 0.1 M HClO <sub>4</sub><br>50 mV/s<br>Ag/AgCl                           | 0.32 / ~0.9                                                | [2]      |
| PtNi multicubes                                  | 0.1M KOH<br>50 mV/s<br>RHE                                              | 0.580 / 0.65                                               | [3]      |
| Pt DEN                                           | 0.1M HClO <sub>4</sub><br>50 mV/s<br>Hg/Hg <sub>2</sub> SO <sub>4</sub> | 0.200 / 0.30                                               | [4]      |
| PdAg/C                                           | 0.5 KOH<br>20 mV/s<br>RHE                                               | 0.944 / 0.60                                               | [5]      |
| Polycrystalline Pd                               | 0.5 M H <sub>2</sub> SO <sub>4</sub><br>20mV/s<br>RHE                   | 0.18 / 0.9                                                 | [6]      |
| Pd/CMK-3-R8-1500-10                              | 0.5 M H <sub>2</sub> SO <sub>4</sub><br>20 mV/s<br>RHE                  | ~ 0.15 / ~ 0.9                                             | [7]      |
| PdNiO/OLC                                        | 0.1M H <sub>2</sub> SO <sub>4</sub><br>50mV/s<br>RHE                    | 1.44 / 1.16                                                | [8]      |

|                             |                                                            |                 |      |
|-----------------------------|------------------------------------------------------------|-----------------|------|
| PtPd(50%)<br>nanodendrites  | 0.5 M H <sub>2</sub> SO <sub>4</sub><br>20 mV/s<br>SCE     | ~3 / ~0.6       | [9]  |
| PdNiO-CeO <sub>2</sub> /OLC | 0.1M H <sub>2</sub> SO <sub>4</sub><br>50mV/s<br>RHE       | 2.5 / 1.1       | [8]  |
| PdAu/C                      | 0.5 M H <sub>2</sub> SO <sub>4</sub><br>20 mV/s<br>Ag/AgCl | 0.57 / ~ 0.9    | [10] |
| Pd-Pd(4:1)/C                | 1.0 M KOH<br>50 mV/s<br>Hg/HgO                             | ~ 0.18 / ~ -0.1 | [11] |
| Pt/SnO <sub>x</sub>         | 1 M HClO <sub>4</sub><br>20 mV/s<br>RHE                    | 0.870 / 0.70    | [12] |

Table S3. EIS analysis of the catalysts measured in 0.1 M H<sub>2</sub>SO<sub>4</sub>.

| Catalyst      | $R_s$ ( $\Omega$ ) | $R_{ct}$ (k $\Omega$ ) | CPE ( $\mu\text{F.s}^{(1-\alpha)}$ ) | $\alpha$ |
|---------------|--------------------|------------------------|--------------------------------------|----------|
| Pd nanocube   | $96.90 \pm 0.65$   | $30.0 \pm 1.36$        | $55.25 \pm 0.63$                     | 0.757    |
| Pd nanosponge | $99.40 \pm 0.78$   | $47.5 \pm 2.8$         | $42.00 \pm 0.01$                     | 0.817    |
| Pd/C          | $146.20 \pm 0.11$  | $74.3 \pm 1.2$         | $25.30 \pm 2.20$                     | 0.911    |

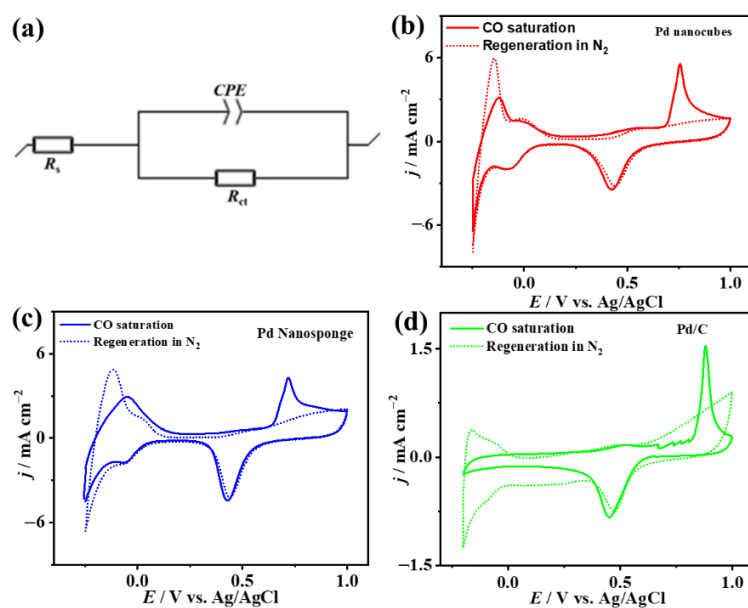

Figure S4. Voigt electrical equivalent circuit (a) and regeneration of the Pd catalysts after CO gas was switched to N<sub>2</sub> for 1 h (b-d).

Table S4. EIS analysis of the catalysts measured in 0.1 M KOH.

| Catalyst      | $R_s$ ( $\Omega$ ) | $R_{ct}$ ( $k\Omega$ ) | CPE ( $\mu F.s^{(1-\alpha)}$ ) | $\alpha$ |
|---------------|--------------------|------------------------|--------------------------------|----------|
| Pd nanocube   | $96.87 \pm 0.65$   | $30.17 \pm 1.3$        | $38.25 \pm 0.63$               | 0.817    |
| Pd nanosponge | $93.34 \pm 0.54$   | $40.49 \pm 2.8$        | $15.82 \pm 1.90$               | 0.757    |
| Pd/C          | $99.40 \pm 0.79$   | $47.49 \pm 2.8$        | $40.50 \pm 1.30$               | 0.821    |

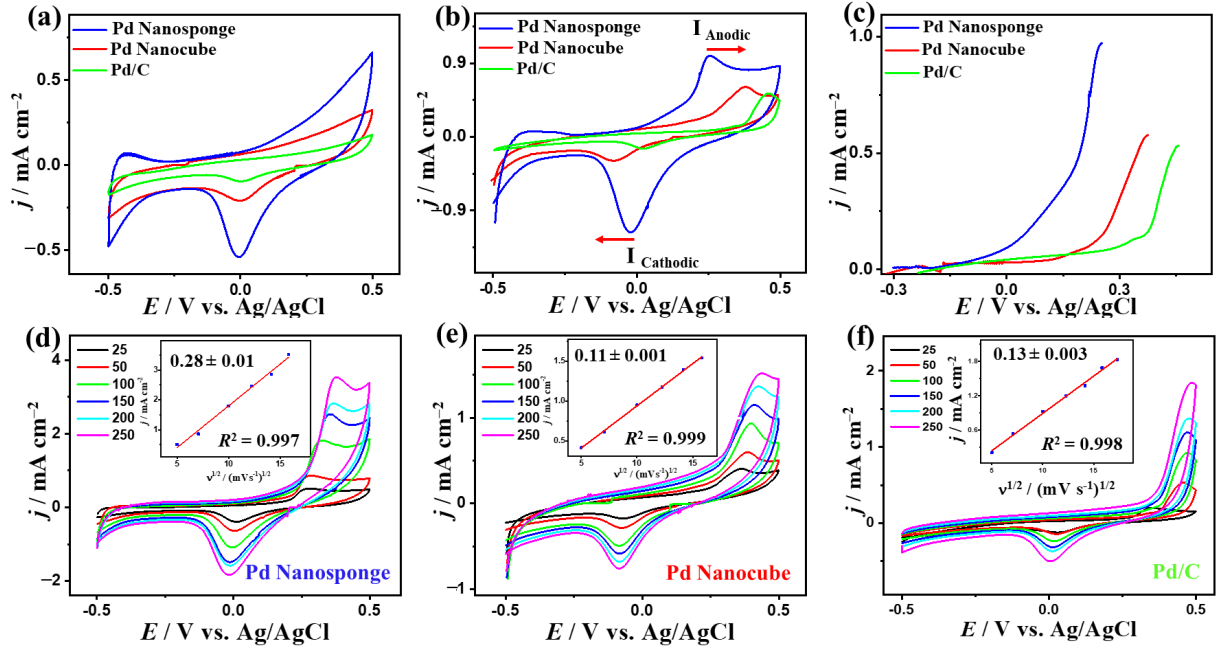

Figure S5. CV curves in  $N_2$ -saturated 0.5 M  $NaHCO_3$  (a),  $CO$ -saturated 0.5 M  $NaHCO_3$  at 50 mV/s (b), LSV at 50 mV/s (c), CV curves at different scan rates and their related plots of  $I_t$  vs.  $v^{1/2}$  of Pd nanosponge, Pd nanocube, and Pd/C (d-f), in  $CO$ -saturated 0.5 M  $NaHCO_3$ .

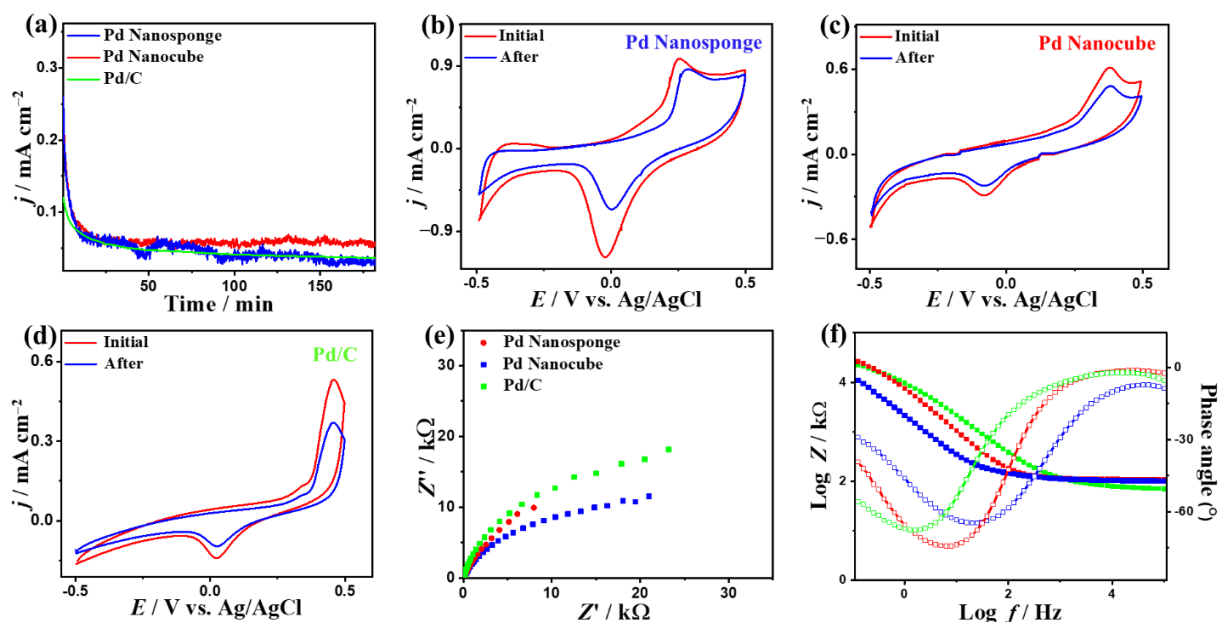

Figure S6. CA tests measured in CO-saturated 0.5 M  $\text{NaHCO}_3$  (a), CV curves measured after CA (b-d), EIS (e), and Bode plots (f) of Pd nanosponge, Pd nanocube, and Pd/C.

Table S5. EIS analysis of the catalysts measured in 0.5 M  $\text{NaHCO}_3$ .

| Catalyst      | $R_s$ ( $\Omega$ ) | $R_{ct}$ ( $\Omega$ ) | CPE ( $\mu\text{F.s}^{(1-\alpha)}$ ) | $\alpha$ |
|---------------|--------------------|-----------------------|--------------------------------------|----------|
| Pd nanosponge | $74.34 \pm 0.56$   | $21.00 \pm 0.746$     | $82.26 \pm 1.5$                      | 0.771    |
| Pd nanocube   | $108.80 \pm 0.87$  | $74.86 \pm 0.11$      | $18.93 \pm 0.35$                     | 0.848    |
| Pd/C          | $120.1 \pm 0.22$   | $81.16 \pm 0.01$      | $16.03 \pm 0.13$                     | 0.878    |

## References

- Eid, K.; Ahmad, Y.H.; Yu, H.; Li, Y.; Li, X.; AlQaradawi, S.Y.; Wang, H.; Wang, L. Rational one-step synthesis of porous PtPdRu nanodendrites for ethanol oxidation reaction with a superior tolerance for CO-poisoning. *Nanoscale* **2017**, *9*, 18881-18889.
- Salah, B.; Eid, K.; Abdelgwad, A.M.; Ibrahim, Y.; Abdullah, A.M.; Hassan, M.K.; Ozoemena, K.I. Titanium Carbide ( $\text{Ti}_3\text{C}_2\text{T}_x$ ) MXene Ornamented with Palladium Nanoparticles for Electrochemical CO Oxidation. *Electroanalysis* **2022**, *34*, 677-683.
- Wu, F.; Eid, K.; Abdullah, A.M.; Niu, W.; Wang, C.; Lan, Y.; Elzatahry, A.A.; Xu, G. Unveiling one-pot template-free fabrication of exquisite multidimensional PtNi multicube nanoarchitectonics for the efficient electrochemical oxidation of ethanol and methanol with a great tolerance for CO. *ACS Appl. Mater. Interfaces* **2020**, *12*, 31309-31318.
- Weir, M.G.; Myers, V.S.; Frenkel, A.I.; Crooks, R.M. In situ X-ray absorption analysis of  $\sim 1.8$  nm dendrimer-encapsulated Pt nanoparticles during electrochemical CO oxidation. *ChemPhysChem* **2010**, *11*, 2942-2950.
- Jurzinsky, T.; Cremers, C.; Pinkwart, K.; Tübke, J. On the influence of Ag on Pd-based electrocatalyst for methanol oxidation in alkaline media: a comparative differential electrochemical mass spectrometry study. *Electrochim. Acta* **2016**, *199*, 270-279.

6. Fang, L.-l.; Tao, Q.; Li, M.-f.; Liao, L.-w.; Chen, D.; Chen, Y.-X. Determination of the real surface area of palladium electrode. *Chin. J. Chem. Phys.* **2010**, *23*, 543-548.
7. Celorrio, V.; Sebastián, D.; Calvillo, L.; García, A.; Fermin, D.J.; Lázaro, M.J. Influence of thermal treatments on the stability of Pd nanoparticles supported on graphitised ordered mesoporous carbons. *Int. J. Hydrogen Energy* **2016**, *41*, 19570-19578.
8. Ipadeola, A.K.; Haruna, A.B.; Abdullah, A.M.; Al-Hajri, R.S.; Viter, R.; Ozoemena, K.I.; Eid, K. Technology. Ternary PdNiO nanocrystals-ornamented porous CeO<sub>2</sub>/onion-like carbon for electrooxidation of carbon monoxide: unveiling the effect of supports and electrolytes. *Catal. Sci. Technol.* **2023**, *13*, 3035-3046.
9. Asmussen, R.M.; Adams, B.D.; Chen, S.; Shah, B.; Chen, A.J.J.o.E.C. Synthesis and electrochemical study of PtPd nanodendrites. *J. Electroanal. Chem.* **2013**, *688*, 151-157.
10. Ulas, B.; Kivrak, A.; Aktas, N.; Kivrak, H. Nanotubes; Nanostructures, C. Carbon monoxide and formic acid electrooxidation study on Au decorated Pd catalysts prepared via microwave assisted polyol method. *Fuller. Nano-tub. Carbon Nanostructures* **2019**, *27*, 545-552.
11. Wang, Y.; Nguyen, T.S.; Liu, X.; Wang, X. Novel palladium-lead (Pd-Pb/C) bimetallic catalysts for electrooxidation of ethanol in alkaline media. *J. Power Sources* **2010**, *195*, 2619-2622.
12. Matsui, T.; Fujiwara, K.; Okanishi, T.; Kikuchi, R.; Takeguchi, T.; Eguchi, K. Electrochemical oxidation of CO over tin oxide supported platinum catalysts. *J. Power Sources* **2006**, *155*, 152-156.
